# Supplementary material
Source: PubMed Central journal article supplement (PMC5278165)
Supplement: IAI.00876-16_zii999091947s3.pdf [file IAI.00876-16_zii999091947s3.pdf]

Supplemental Figure 2. *Chan et al.*

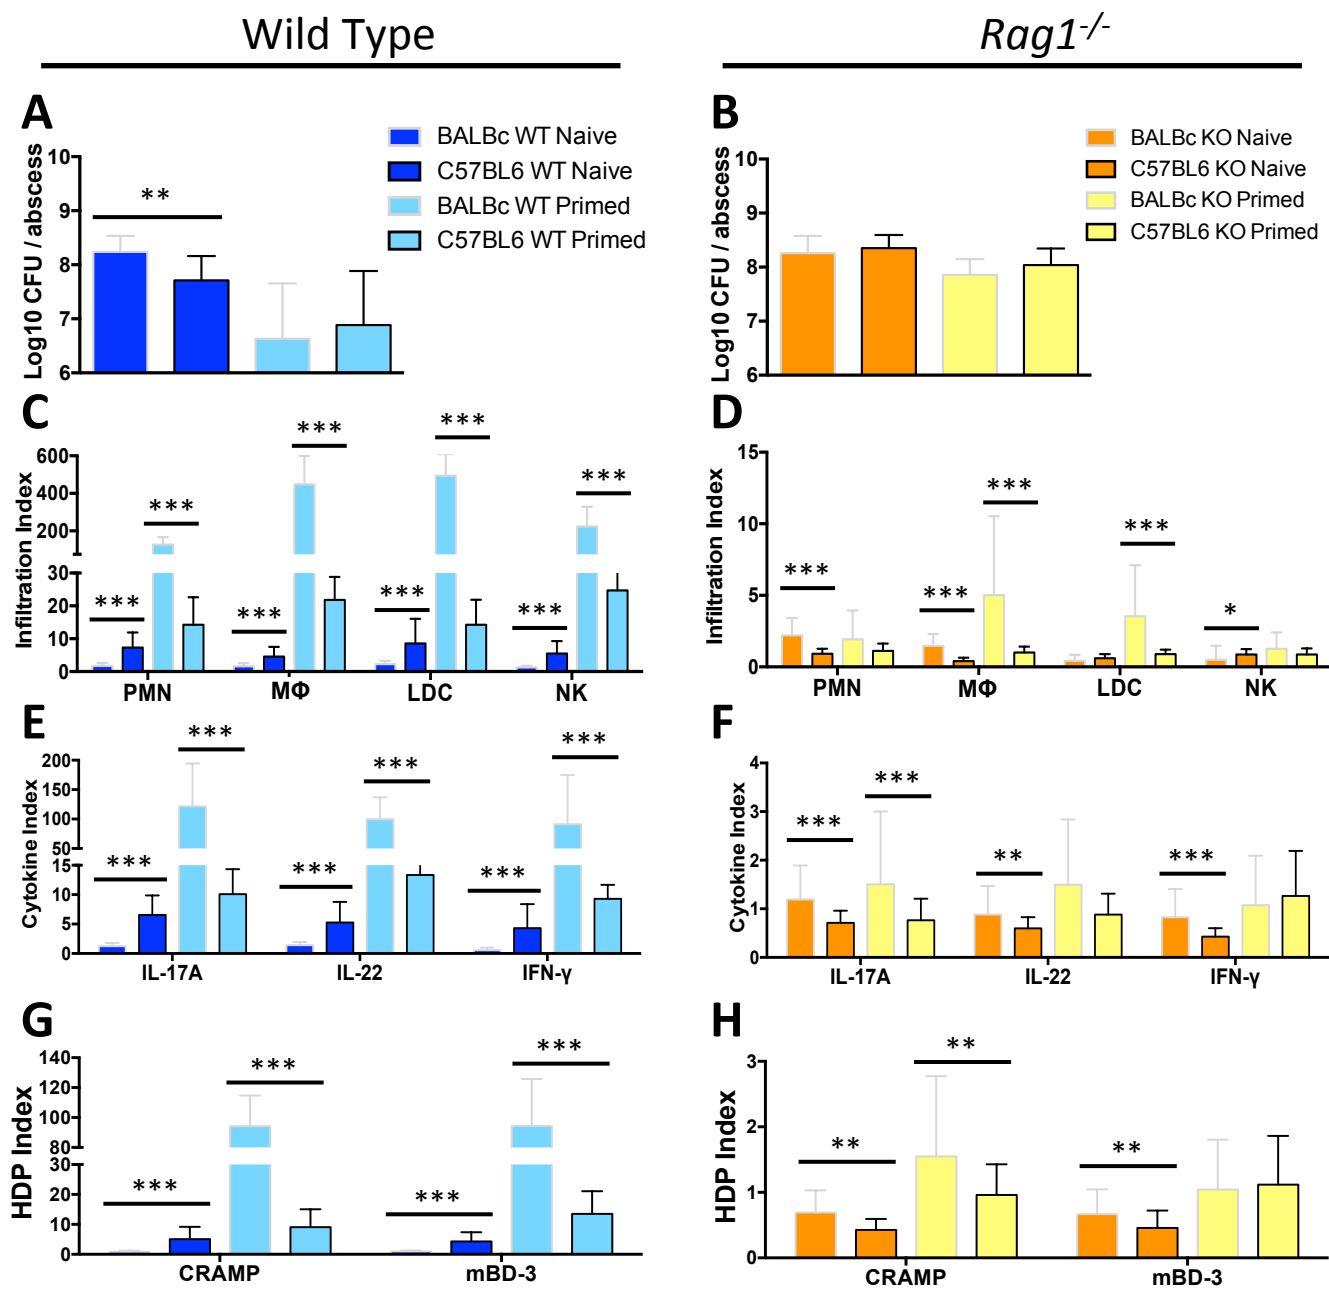

**Supplemental Figure 2.** Mouse genetic background influences priming effects on host protection and pro-inflammatory responses. MRSA SSSI in BALB/c naïve mice resulted in greater bacterial burden in skin abscesses as compared to C57BL/6 naïve mice (A). No differences were found in *rag1*<sup>-/-</sup> mice (B).  $P < 0.01$  (\*\*) vs. corresponding BALB/c mice (wild-type,  $N \geq 16$ ; *rag1*<sup>-/-</sup>,  $N \geq 8$ ) using student's t-test. Data are represented as mean  $\pm$  SD. Immune cell infiltration (C-D), cytokine expression (E-F) and host defense peptide (HDP) induction (G-H) indices of BALB/c versus C57BL/6 were compared during primary and secondary MRSA SSSI. Pro-inflammatory responses were greater in wild-type C57BL/6 mice as compared to BALB/c mice during primary MRSA SSSI. However, BALB/c mice had greater pro-inflammatory responses during recurrent MRSA SSSI as compared to C57BL/6 mice (C, E, G). Pro-inflammatory responses in C57BL/6 mice were absent in the *rag1*<sup>-/-</sup> background. Select host responses in the BALB/c background were induced in the absence of adaptive immunity (D, F, H).  $P < 0.001$  (\*\*\*) versus corresponding BALB/c mice via student's t test ( $N \geq 10+$  images per sample). Cytokine index was calculated by taking expression levels of samples (% of uninfected control) normalized per  $10^6$  MRSA CFU in abscesses of corresponding samples as previously described (1). Data are represented as mean index  $\pm$  SD.
